# Supplementary material for: Permeability of matrices of agricultural crops to Euglossina bees (Hymenoptera, Apidae) in the Atlantic Rain Forest
Source: Springer Nature journal article supplement (doi:10.1007/s13592-015-0359-9), 2015-03-17
Supplement: MOESM1 [file 13592_2015_359_MOESM1_ESM.pdf]

**Permeability of matrices of agricultural crops to Euglossina bees (Hymenoptera, Apidae) in the Atlantic Rain Forest**

Jaqueline Figuerêdo Rosa\*, Mauro Ramalho, Daniela Monteiro, Marília Dantas e Silva

\* **Corresponding Author:** Instituto Federal de Educação, Ciência e Tecnologia Baiano,  
Campus Guanambi. Distrito de Ceraíma, Caixa Postal 9, 46430000, Guanambi, Bahia, Brasil

e-mails: [jaquefrosa@gmail.com](mailto:jaquefrosa@gmail.com), [jaqueline.rosa@guanambi.ifbaiano.edu.br](mailto:jaqueline.rosa@guanambi.ifbaiano.edu.br)

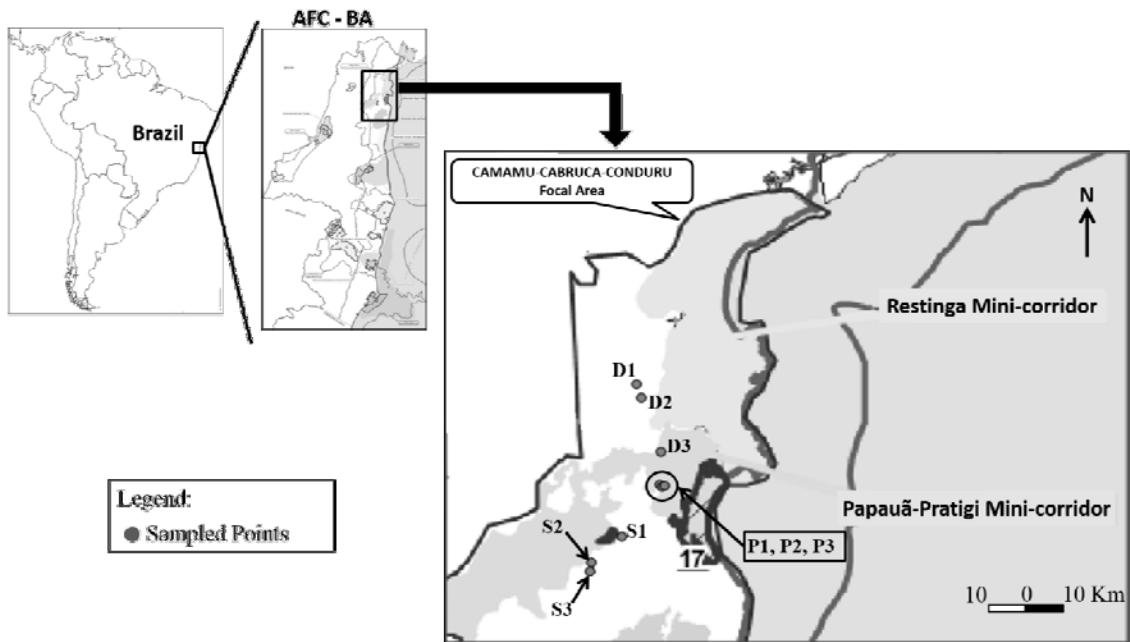

**Online Resource 1.** The forest fragments and arboreal matrices (D1-3, P1-3, S1-3) sampled in the Atlantic Forest Corridor Bahia (AFC - BA). For point's acronyms and coordinates see Online Resource 2. Adapted from: SEMA, Environment Secretary (2008) Corredor Central da Mata Atlântica: CCMA - BAHIA.

[online][http://www.corredoresecologicos.ba.gov.br/images/stories/mapas/80dpi/pdf/ccma\\_mini\\_corredores\\_2008.pdf](http://www.corredoresecologicos.ba.gov.br/images/stories/mapas/80dpi/pdf/ccma_mini_corredores_2008.pdf) (accessed on 05 Jan 14).

**Online Resource 2.** Data on mosaic types of Atlantic rainforest and arboreal matrices in the AFC and sampling period of Euglossine. PA = Point Abbreviation.

| <b>PA</b> | <b>Surrounding Matrix</b> | <b>Geographic Coordinates</b>     | <b>Area (ha)</b> | <b>Sampling Period</b> |
|-----------|---------------------------|-----------------------------------|------------------|------------------------|
| D1        | Oil Palm                  | S 13°29'01.5"<br>W 039°08'42.6"   | 650*             | 1) 09 and 10/Feb/2010  |
| D2        | Oil Palm                  | S 13°30'38.7"<br>W 039°08'14.1"   | 108*             | 2) 04 and 05/June/2010 |
| D3        | Oil Palm                  | S 13°37'03.7"<br>W 039°06'05.5"   | **               | 3) 07 and 09/Jan/2011  |
| P1        | Piassava palm             | S 13°40'52"<br>W 039°06'10.6"     | 309*             | 1) 09 and 10/Jan/2011  |
| P2        | Piassava palm             | S 13°41'11.88"<br>W 039°05'57.12" |                  | 2) 03 and 04/Feb/2011  |
| P3        | Piassava palm             | S 13°40'59.5"<br>W 039°05'39.7"   |                  | 3) 11 and 12/Mar/2011  |
| S1        | Rubber tree               | S13°47'01.3"<br>W039°10'23.9"     | 625***           | 1) 03 and 04/Aug/2009  |
| S2        | Rubber tree               | S13°50'05.3"<br>W039°13'36.4"     | 140***           | 2) 04 and 05/Feb/2010  |
| S3        | Rubber tree               | S13°51'04.0"<br>W039°13'46.7"     | 4.349*           | 3) 12 and 13/Nov/2010  |

\* Estimated from maps in SHAPE format made available by the SOS Fundação Mata Atlântica,

on: <http://mapas.sosma.org.br/>, accessed in September 14, 2013.

\*\* It was not possible to estimate.

\*\*\*From Ramalho et al. (2013)

**Online Resource 3.** Absolute abundance (number of individuals) of the species of Euglossine sampled per mosaic. MRM = Mosaic of forest fragments and rubber tree matrix; MPM = Mosaic of forest fragments and piassava palm matrix; MOM = Mosaic of forest fragments and oil palm matrix.

| <b>Species</b>                                   | <b>MRM</b> | <b>MPM</b> | <b>MOM</b> | <b>T</b> |
|--------------------------------------------------|------------|------------|------------|----------|
| <i>Euglossa aratingae</i> Nemésio, 2009          |            |            | 1          | 1        |
| <i>Euglossa carinilabris</i> Dressler, 1982      |            | 1          | 2          | 3        |
| <i>Euglossa carolina</i> Nemésio, 2009           | 125        | 107        | 274        | 506      |
| <i>Euglossa clausi</i> Nemésio e Engel, 2012     | 22         | 2          | 2          | 26       |
| <i>Euglossa crassipunctata</i> Moure, 1968       | 2          | 2          | 1          | 4        |
| <i>Euglossa despecta</i> Moure, 1968             | 2          | 1          | 3          | 6        |
| <i>Euglossa hemichlora</i> Cockerell, 1917       | 1          | 1          | 5          | 7        |
| <i>Euglossa ignita</i> Smith, 1874               | 269        | 97         | 146        | 512      |
| <i>Euglossa imperialis</i> Cockerell, 1922       | 77         | 6          | 5          | 88       |
| <i>Euglossa iopoecila</i> Dressler, 1982         | 7          |            |            | 7        |
| <i>Euglossa leucotricha</i> Rebêlo e Moure, 1996 | 1          |            |            | 1        |
| <i>Euglossa liopoda</i> Dressler, 1982           | 6          | 7          | 5          | 18       |
| <i>Euglossa melanotricha</i> Moure, 1967         | 7          | 1          | 1          | 9        |
| <i>Euglossa nanomelanotricha</i> Nemésio, 2009   |            |            |            | 1        |
| <i>Euglossa securigera</i> Dressler, 1982        | 14         | 5          | 35         | 54       |
| <i>Euglossa truncata</i> Rebêlo e Moure, 1996    | 1          | 1          |            | 2        |
| <i>Eulaema athleticana</i> Nemésio, 2009         | 247        | 138        | 101        | 486      |
| <i>Eulaema nigrita</i> Lepeletier, 1841          | 480        | 589        | 330        | 1399     |
| <i>Eulaema niveofasciata</i> Friese, 1899        |            | 1          | 2          | 3        |
| <i>Exaerete frontalis</i> Guérin, 1844           | 4          | 7          | 1          | 12       |
| <i>Exaerete smaragdina</i> Guérin, 1844          | 2          |            |            | 2        |
| <b>Total</b>                                     | 1267       | 967        | 913        | 3147     |

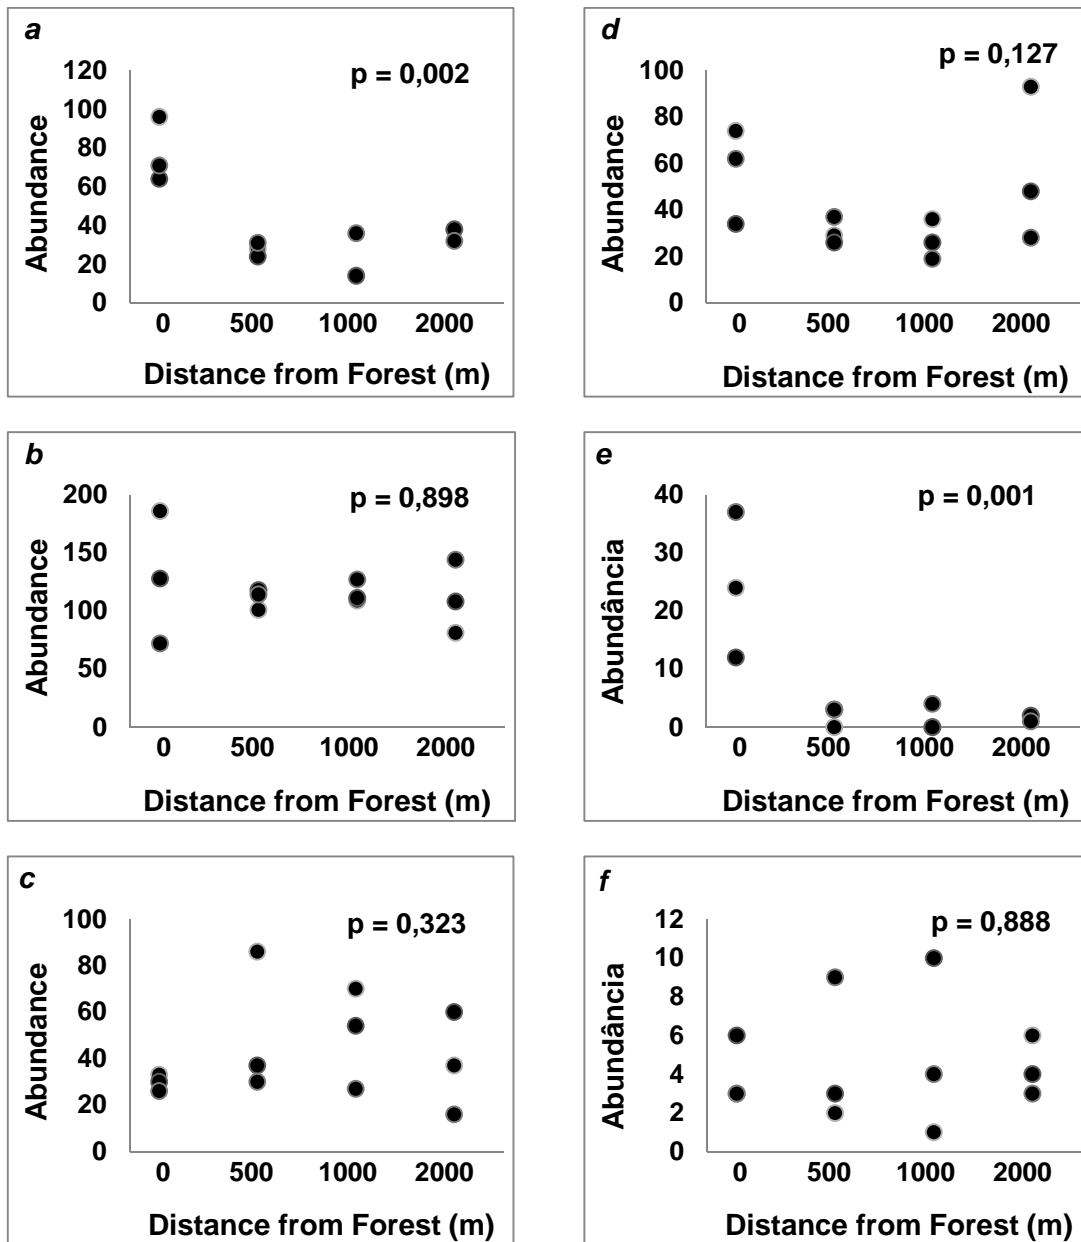

**Online Resource 4.** Spatial distribution of abundance (sum of sampled individuals in the three mosaics) of the most abundant species of Euglossine bees, in mosaics of Atlantic Forest and arboreal crops (rubber tree, oil palm and piassava palm) in the Brazilian Atlantic Forest Corridor. **a** *Eulaema athleticana*; **b** *Eulaema nigrita*; **c** *Euglossa carolina*; **d** *Euglossa ignita*; **e** *Euglossa imperialis*; **f** *Euglossa securigera*.
